# Supplementary material for: ANCO-GeneDB: annotations and comprehensive analysis of candidate genes for alcohol, nicotine, cocaine and opioid dependence
Source: Oxford University Press journal article supplement (doi:10.1093/database/bay121), 2018-01-01
Supplement: anco_db_supplementary_tables.pdf [file anco_db_supplementary_tables.pdf]

**Table S1. Results (p values) of Tissue-Specific Enrichment Analysis (TSEA)**

| Tissue                                    | P value     |             |             |             |             |
|-------------------------------------------|-------------|-------------|-------------|-------------|-------------|
|                                           | ANCO        | AD          | ND          | CD          | OD          |
| Adipose - Subcutaneous                    | 0.000155922 | 0.000155922 | 0.001298167 | 0.163027126 | 0.163027126 |
| Adipose - Visceral (Omentum)              | 0.115317091 | 0.07434769  | 0.029026166 | 0.265736548 | 0.203783908 |
| Adrenal Gland                             | 0.115669911 | 0.115669911 | 0.553591292 | 0.115669911 | 0.793555289 |
| Artery - Aorta                            | 1.34E-05    | 6.17E-05    | 1.34E-05    | 0.023709219 | 0.024878251 |
| Artery - Coronary                         | 0.004112353 | 0.004112353 | 0.015174088 | 0.052215022 | 0.163027126 |
| Artery - Tibial                           | 3.08E-08    | 5.88E-07    | 5.88E-07    | 0.023709219 | 0.068618715 |
| Brain - Amygdala                          | 6.06E-16    | 2.43E-13    | 2.53E-09    | 2.18E-09    | 0.000539975 |
| Brain - Anterior cingulate cortex (BA24)  | 3.79E-19    | 6.80E-15    | 4.95E-12    | 1.63E-09    | 2.37E-05    |
| Brain - Caudate (basal ganglia)           | 1.46E-15    | 6.80E-15    | 8.04E-09    | 3.94E-08    | 0.000539975 |
| Brain - Cerebellar Hemisphere             | 5.60E-11    | 2.12E-08    | 8.52E-10    | 0.001390792 | 0.024878251 |
| Brain - Cerebellum                        | 2.07E-09    | 1.25E-07    | 2.17E-07    | 0.023709219 | 0.024878251 |
| Brain - Cortex                            | 2.34E-13    | 8.24E-11    | 6.03E-09    | 2.18E-09    | 0.002186178 |
| Brain - Frontal Cortex (BA9)              | 6.46E-18    | 4.16E-14    | 4.95E-12    | 1.63E-09    | 2.37E-05    |
| Brain - Hippocampus                       | 3.49E-15    | 7.27E-12    | 1.88E-08    | 1.79E-07    | 0.000539975 |
| Brain - Hypothalamus                      | 4.09E-17    | 2.43E-13    | 1.40E-09    | 3.13E-06    | 0.00786015  |
| Brain - Nucleus accumbens (basal ganglia) | 3.49E-15    | 4.16E-14    | 1.41E-08    | 1.10E-08    | 0.002186178 |
| Brain - Putamen (basal ganglia)           | 1.93E-14    | 1.01E-13    | 7.33E-08    | 5.25E-08    | 0.000119326 |
| Brain - Spinal cord (cervical c-1)        | 7.27E-12    | 7.27E-12    | 1.01E-06    | 0.052215022 | 0.068618715 |
| Brain - Substantia nigra                  | 4.09E-17    | 1.01E-13    | 2.27E-10    | 3.94E-08    | 0.024878251 |
| Breast - Mammary Tissue                   | 0.000348745 | 0.000458995 | 0.000348745 | 0.163027126 | 0.163027126 |
| Colon - Sigmoid                           | 0.000819439 | 0.009038065 | 1.42E-06    | 0.329450374 | 0.329450374 |
| Colon - Transverse                        | 0.82179487  | 0.82179487  | 0.82179487  | 0.82179487  | 0.82179487  |
| Esophagus - Gastroesophageal Junction     | 0.004169941 | 0.066705152 | 5.36E-05    | 0.512285369 | 0.559549141 |
| Esophagus - Mucosa                        | 0.995270545 | 0.995270545 | 0.995270545 | 0.995270545 | 0.995270545 |
| Esophagus - Muscularis                    | 0.002826265 | 0.036299088 | 0.00069749  | 0.575084581 | 0.575084581 |
| Heart - Atrial Appendage                  | 0.009239334 | 0.009239334 | 0.015174088 | 0.265736548 | 0.203783908 |
| Heart - Left Ventricle                    | 3.61E-05    | 5.41E-05    | 0.000232497 | 0.052215022 | 0.329450374 |
| Kidney - Cortex                           | 0.949201912 | 0.949201912 | 0.949201912 | 0.949201912 | 0.949201912 |
| Liver                                     | 0.914577681 | 0.914577681 | 0.416374554 | 0.407567816 | 0.407567816 |
| Lung                                      | 0.663755599 | 0.663755599 | 0.663755599 | 0.663755599 | 0.663755599 |
| Minor Salivary Gland                      | 0.135582044 | 0.135582044 | 0.255580942 | 1           | 1           |

|                                     |             |             |             |             |             |
|-------------------------------------|-------------|-------------|-------------|-------------|-------------|
| Muscle - Skeletal                   | 0.080313216 | 0.080313216 | 0.193811234 | 0.332170686 | 0.793555289 |
| Nerve - Tibial                      | 0.001638878 | 0.026201627 | 0.022761132 | 0.332170686 | 0.793555289 |
| Ovary                               | 0.966014589 | 0.966014589 | 0.966014589 | 0.966014589 | 0.966014589 |
| Pancreas                            | 0.998282028 | 0.998282028 | 0.998282028 | 0.998282028 | 0.998282028 |
| Pituitary                           | 0.901731754 | 0.914577681 | 0.901731754 | 0.03974154  | 0.901731754 |
| Prostate                            | 0.680167506 | 0.680167506 | 0.949201912 | 0.949201912 | 0.949201912 |
| Skin - Not Sun Exposed (Suprapubic) | 1           | 1           | 1           | 1           | 1           |
| Skin - Sun Exposed (Lower leg)      | 0.640378    | 0.640378    | 0.959044014 | 0.959044014 | 0.959044014 |
| Small Intestine - Terminal Ileum    | 0.999682015 | 0.999682015 | 0.999682015 | 0.999682015 | 0.999682015 |
| Spleen                              | 0.949201912 | 0.949201912 | 0.949201912 | 0.949201912 | 0.949201912 |
| Stomach                             | 0.699436427 | 0.699436427 | 0.699436427 | 0.94721774  | 0.699436427 |
| Testis                              | 1           | 1           | 1           | 1           | 1           |
| Thyroid                             | 0.329768045 | 0.265437048 | 0.329768045 | 0.94721774  | 0.699436427 |
| Uterus                              | 0.181000185 | 0.181000185 | 0.312280915 | 0.181000185 | 0.329450374 |
| Vagina                              | 0.949201912 | 0.949201912 | 0.949201912 | 0.949201912 | 0.949201912 |
| Whole Blood                         | 0.793555289 | 0.793555289 | 0.793555289 | 0.793555289 | 0.793555289 |

**Table S2. Results of eQTLenrich analysis for AD-GWAS dataset and ND-GWAS dataset**

| GWAS_Trait | Tissue_eQTL                           | Number_best_eQTL_per_eGenes_overlapping_with_GWAS | Number_null_variants_overlapping_with_GWAS | OBS_number_eQTLs_with_GWAS_p<0.05 | EXP_number_eQTLs_with_GWAS_p<0.05 | Number_true_positive_trait_associations_amongst_eQTLs_with_GWAS_p<0.05_(OBS-EXP) | Fold-Enrichment_(OBS/EXP) | EXP_number_eQTLs_with_GWAS_p<0.05_Adj | Adjusted_number_true_positive_trait_associations_amongst_eQTLs_with_GWAS_p<0.05_(Adj_OBS-EXP) | Adjusted_Fold-Enrichment_(Adj_OBS/EXP) | Lower_bound_95%_confidence_interval | Upper_bound_95%_confidence_interval | Enrichment_P-value_(matched_on_confounders) |
|------------|---------------------------------------|---------------------------------------------------|--------------------------------------------|-----------------------------------|-----------------------------------|----------------------------------------------------------------------------------|---------------------------|---------------------------------------|-----------------------------------------------------------------------------------------------|----------------------------------------|-------------------------------------|-------------------------------------|---------------------------------------------|
| ND         | Adipose_Subcutaneous                  | 2367                                              | 2834                                       | 143                               | 118                               | 25                                                                               | 1.21                      | 115                                   | 28                                                                                            | 1.24                                   | 1.1                                 | 1.41                                | 1.03E-01                                    |
| ND         | Adipose_Visceral_Omentum              | 1249                                              | 4016                                       | 72                                | 62                                | 10                                                                               | 1.15                      | 76                                    | 0                                                                                             | 0.95                                   | 0.78                                | 1.13                                | 5.31E-01                                    |
| ND         | Adrenal_Gland                         | 943                                               | 4452                                       | 50                                | 47                                | 3                                                                                | 1.06                      | 55                                    | 0                                                                                             | 0.91                                   | 0.72                                | 1.09                                | 4.78E-01                                    |
| ND         | Artery_Aorta                          | 1833                                              | 3372                                       | 88                                | 92                                | -4                                                                               | 0.96                      | 103                                   | 0                                                                                             | 0.85                                   | 0.73                                | 0.98                                | 9.31E-01                                    |
| ND         | Artery_Coronary                       | 672                                               | 4905                                       | 34                                | 34                                | 0                                                                                | 1.01                      | 33                                    | 1                                                                                             | 1.03                                   | 0.71                                | 1.31                                | 1.50E-01                                    |
| ND         | Artery_Tibial                         | 2289                                              | 2646                                       | 115                               | 114                               | 1                                                                                | 1                         | 112                                   | 3                                                                                             | 1.02                                   | 0.89                                | 1.16                                | 2.07E-01                                    |
| ND         | Brain_Anterior_cingulate_cortex_BA24  | 317                                               | 5244                                       | 20                                | 16                                | 4                                                                                | 1.26                      | 16                                    | 4                                                                                             | 1.25                                   | 0.56                                | 1.73                                | 4.60E-04                                    |
| ND         | Brain_Caudate_basal_ganglia           | 703                                               | 5010                                       | 49                                | 35                                | 14                                                                               | 1.39                      | 37                                    | 12                                                                                            | 1.32                                   | 1.07                                | 1.64                                | 7.98E-01                                    |
| ND         | Brain_Cerebellar_Hemisphere           | 904                                               | 5014                                       | 54                                | 45                                | 9                                                                                | 1.19                      | 50                                    | 4                                                                                             | 1.09                                   | 0.83                                | 1.33                                | 3.05E-02                                    |
| ND         | Brain_Cerebellum                      | 1230                                              | 4664                                       | 76                                | 62                                | 15                                                                               | 1.24                      | 65                                    | 11                                                                                            | 1.17                                   | 0.96                                | 1.43                                | 3.12E-01                                    |
| ND         | Brain_Cortex                          | 756                                               | 5054                                       | 41                                | 38                                | 3                                                                                | 1.08                      | 42                                    | 0                                                                                             | 0.97                                   | 0.75                                | 1.22                                | 7.99E-01                                    |
| ND         | Brain_Frontal_Cortex_BA9              | 582                                               | 5048                                       | 38                                | 29                                | 9                                                                                | 1.31                      | 31                                    | 7                                                                                             | 1.21                                   | 0.9                                 | 1.59                                | 3.25E-01                                    |
| ND         | Brain_Hippocampus                     | 322                                               | 5419                                       | 24                                | 16                                | 8                                                                                | 1.49                      | 17                                    | 7                                                                                             | 1.45                                   | 0.9                                 | 2.07                                | 1.70E-02                                    |
| ND         | Brain_Hypothalamus                    | 330                                               | 5455                                       | 15                                | 17                                | -2                                                                               | 0.91                      | 18                                    | 0                                                                                             | 0.85                                   | 0.46                                | 1.19                                | 3.17E-01                                    |
| ND         | Brain_Nucleus_accumbens_basal_ganglia | 588                                               | 5121                                       | 39                                | 29                                | 10                                                                               | 1.33                      | 33                                    | 6                                                                                             | 1.18                                   | 0.93                                | 1.5                                 | 4.52E-01                                    |
| ND         | Brain_Putamen_basal_ganglia           | 427                                               | 5063                                       | 28                                | 21                                | 7                                                                                | 1.31                      | 23                                    | 5                                                                                             | 1.22                                   | 0.83                                | 1.7                                 | 2.88E-01                                    |
| ND         | Breast_Mammary_Tissue                 | 1187                                              | 4421                                       | 72                                | 59                                | 13                                                                               | 1.21                      | 59                                    | 13                                                                                            | 1.23                                   | 0.98                                | 1.46                                | 1.13E-03                                    |
| ND         | Cells_EBV-transformed_lymphocytes     | 843                                               | 4077                                       | 50                                | 42                                | 8                                                                                | 1.19                      | 51                                    | 0                                                                                             | 0.99                                   | 0.79                                | 1.22                                | 7.95E-01                                    |
| ND         | Cells_Transformed_fibroblasts         | 2502                                              | 2274                                       | 149                               | 125                               | 24                                                                               | 1.19                      | 129                                   | 20                                                                                            | 1.16                                   | 1.02                                | 1.31                                | 1.35E-03                                    |
| ND         | Colon_Sigmoid                         | 812                                               | 4587                                       | 41                                | 41                                | 0                                                                                | 1.01                      | 47                                    | 0                                                                                             | 0.87                                   | 0.68                                | 1.08                                | 9.75E-01                                    |
| ND         | Colon_Transverse                      | 1324                                              | 4203                                       | 68                                | 66                                | 2                                                                                | 1.03                      | 72                                    | 0                                                                                             | 0.94                                   | 0.77                                | 1.11                                | 4.16E-01                                    |
| ND         | Esophagus_Gastroesophageal_Junction   | 793                                               | 4554                                       | 45                                | 40                                | 5                                                                                | 1.13                      | 39                                    | 6                                                                                             | 1.15                                   | 0.89                                | 1.44                                | 4.26E-01                                    |
| ND         | Esophagus_Mucosa                      | 2069                                              | 3184                                       | 127                               | 103                               | 24                                                                               | 1.23                      | 112                                   | 15                                                                                            | 1.14                                   | 0.99                                | 1.27                                | 1.30E-04                                    |
| ND         | Esophagus_Muscularis                  | 1954                                              | 3197                                       | 112                               | 98                                | 14                                                                               | 1.15                      | 101                                   | 11                                                                                            | 1.1                                    | 0.96                                | 1.27                                | 3.65E-01                                    |
| ND         | Heart_Atrial_Appendage                | 1125                                              | 4019                                       | 62                                | 56                                | 6                                                                                | 1.1                       | 62                                    | 0                                                                                             | 1                                      | 0.82                                | 1.19                                | 8.44E-01                                    |

|    |                                       |      |      |     |     |    |      |     |    |      |      |      |           |
|----|---------------------------------------|------|------|-----|-----|----|------|-----|----|------|------|------|-----------|
| ND | Heart_Left_Ventricle                  | 1309 | 3504 | 82  | 65  | 17 | 1.25 | 67  | 15 | 1.23 | 0.98 | 1.45 | <1.00e-05 |
| ND | Liver                                 | 441  | 4646 | 28  | 22  | 6  | 1.27 | 24  | 4  | 1.17 | 0.85 | 1.66 | 8.93E-01  |
| ND | Lung                                  | 2068 | 3444 | 141 | 103 | 38 | 1.36 | 103 | 38 | 1.37 | 1.12 | 1.55 | <1.00e-05 |
| ND | Muscle_Skeletal                       | 1947 | 2490 | 102 | 97  | 5  | 1.05 | 99  | 3  | 1.03 | 0.9  | 1.18 | 8.68E-01  |
| ND | Nerve_Tibial                          | 2878 | 2957 | 160 | 144 | 16 | 1.11 | 146 | 14 | 1.1  | 0.97 | 1.22 | 3.20E-02  |
| ND | Ovary                                 | 442  | 5344 | 26  | 22  | 4  | 1.18 | 23  | 3  | 1.15 | 0.78 | 1.56 | 4.23E-01  |
| ND | Pancreas                              | 1266 | 3924 | 67  | 63  | 4  | 1.06 | 69  | 0  | 0.97 | 0.8  | 1.15 | 7.33E-01  |
| ND | Pituitary                             | 619  | 5581 | 36  | 31  | 5  | 1.16 | 31  | 5  | 1.16 | 0.9  | 1.54 | 8.82E-01  |
| ND | Prostate                              | 397  | 5729 | 21  | 20  | 1  | 1.06 | 21  | 0  | 1    | 0.7  | 1.43 | 9.42E-01  |
| ND | Skin_Not_Sun_Exposed_Suprapubic       | 1534 | 3906 | 81  | 77  | 4  | 1.06 | 88  | 0  | 0.92 | 0.78 | 1.07 | 7.17E-01  |
| ND | Skin_Sun_Exposed_Lower_leg            | 2501 | 3025 | 137 | 125 | 12 | 1.1  | 136 | 1  | 1.01 | 0.9  | 1.14 | 8.95E-01  |
| ND | Small_Intestine_Terminal_Ileum        | 357  | 5800 | 21  | 18  | 3  | 1.18 | 18  | 3  | 1.16 | 0.74 | 1.69 | 3.12E-01  |
| ND | Spleen                                | 757  | 5039 | 36  | 38  | -2 | 0.95 | 39  | 0  | 0.93 | 0.73 | 1.21 | 9.98E-01  |
| ND | Stomach                               | 1036 | 4281 | 59  | 52  | 7  | 1.14 | 52  | 7  | 1.14 | 0.87 | 1.36 | 1.64E-02  |
| ND | Testis                                | 2696 | 5368 | 134 | 135 | -1 | 0.99 | 155 | 0  | 0.87 | 0.77 | 0.98 | 9.99E-01  |
| ND | Thyroid                               | 2805 | 2895 | 183 | 140 | 43 | 1.3  | 155 | 28 | 1.18 | 1.05 | 1.31 | 1.62E-03  |
| ND | Uterus                                | 267  | 5648 | 19  | 13  | 6  | 1.42 | 14  | 5  | 1.36 | 0.85 | 1.95 | 2.14E-01  |
| ND | Vagina                                | 218  | 5872 | 11  | 11  | 0  | 1.01 | 12  | 0  | 0.95 | 0.54 | 1.53 | 8.86E-01  |
| ND | Whole_Blood                           | 1851 | 2497 | 114 | 93  | 21 | 1.23 | 96  | 18 | 1.19 | 1.04 | 1.36 | 9.13E-02  |
| AD | Adipose_Subcutaneous                  | 1301 | 1487 | 83  | 65  | 18 | 1.28 | 79  | 4  | 1.05 | 0.9  | 1.24 | 3.81E-01  |
| AD | Adipose_Visceral_Omentum              | 678  | 2042 | 38  | 34  | 4  | 1.12 | 47  | 0  | 0.81 | 0.67 | 0.98 | 1.00E+00  |
| AD | Adrenal_Gland                         | 502  | 2295 | 34  | 25  | 9  | 1.35 | 31  | 3  | 1.1  | 0.88 | 1.39 | 6.73E-01  |
| AD | Artery_Aorta                          | 988  | 1769 | 65  | 49  | 16 | 1.32 | 59  | 6  | 1.11 | 0.92 | 1.32 | 5.07E-01  |
| AD | Artery_Coronary                       | 360  | 2549 | 20  | 18  | 2  | 1.11 | 21  | 0  | 0.95 | 0.65 | 1.27 | 7.59E-01  |
| AD | Artery_Tibial                         | 1322 | 1460 | 87  | 66  | 21 | 1.32 | 76  | 11 | 1.14 | 0.95 | 1.34 | 9.80E-04  |
| AD | Brain_Anterior_cingulate_cortex_BA24  | 159  | 2743 | 13  | 8   | 5  | 1.64 | 11  | 2  | 1.23 | 0.61 | 1.81 | 2.58E-02  |
| AD | Brain_Caudate_basal_ganglia           | 389  | 2672 | 26  | 19  | 7  | 1.34 | 24  | 2  | 1.07 | 0.83 | 1.47 | 9.96E-01  |
| AD | Brain_Cerebellar_Hemisphere           | 507  | 2625 | 30  | 25  | 5  | 1.18 | 34  | 0  | 0.89 | 0.69 | 1.11 | 9.44E-01  |
| AD | Brain_Cerebellum                      | 672  | 2465 | 39  | 34  | 5  | 1.16 | 41  | 0  | 0.94 | 0.76 | 1.15 | 9.55E-01  |
| AD | Brain_Cortex                          | 420  | 2626 | 27  | 21  | 6  | 1.29 | 26  | 1  | 1.03 | 0.8  | 1.35 | 9.99E-01  |
| AD | Brain_Frontal_Cortex_BA9              | 330  | 2628 | 12  | 17  | -5 | 0.73 | 21  | 0  | 0.58 | 0.4  | 0.77 | 9.96E-01  |
| AD | Brain_Hippocampus                     | 174  | 2751 | 9   | 9   | 0  | 1.03 | 12  | 0  | 0.78 | 0.42 | 1.12 | 8.04E-01  |
| AD | Brain_Hypothalamus                    | 191  | 2897 | 10  | 10  | 0  | 1.05 | 12  | 0  | 0.86 | 0.57 | 1.24 | 9.02E-01  |
| AD | Brain_Nucleus_accumbens_basal_ganglia | 338  | 2636 | 15  | 17  | -2 | 0.89 | 21  | 0  | 0.72 | 0.5  | 0.97 | 9.95E-01  |
| AD | Brain_Putamen_basal_ganglia           | 244  | 2605 | 12  | 12  | 0  | 0.98 | 16  | 0  | 0.73 | 0.49 | 0.99 | 9.88E-01  |
| AD | Breast_Mammary_Tissue                 | 676  | 2310 | 46  | 34  | 12 | 1.36 | 45  | 1  | 1.01 | 0.85 | 1.24 | 8.53E-01  |
| AD | Cells_EBV-transformed_lymphocytes     | 464  | 2154 | 32  | 23  | 9  | 1.38 | 27  | 5  | 1.2  | 0.93 | 1.56 | 1.34E-01  |
| AD | Cells_Transformed_fibroblasts         | 1415 | 1229 | 95  | 71  | 24 | 1.34 | 90  | 5  | 1.06 | 0.89 | 1.22 | 1.76E-01  |
| AD | Colon_Sigmoid                         | 453  | 2382 | 33  | 23  | 10 | 1.46 | 30  | 3  | 1.09 | 0.85 | 1.38 | 4.80E-01  |
| AD | Colon_Transverse                      | 736  | 2205 | 41  | 37  | 4  | 1.11 | 39  | 2  | 1.04 | 0.76 | 1.28 | 1.31E-02  |
| AD | Esophagus_Gastroesophageal_Junction   | 437  | 2342 | 26  | 22  | 4  | 1.19 | 28  | 0  | 0.93 | 0.7  | 1.2  | 9.59E-01  |

|    |                                 |      |      |     |    |    |      |    |    |      |      |      |          |
|----|---------------------------------|------|------|-----|----|----|------|----|----|------|------|------|----------|
| AD | Esophagus_Mucosa                | 1170 | 1711 | 57  | 59 | -2 | 0.97 | 64 | 0  | 0.89 | 0.77 | 1.05 | 1.00E+00 |
| AD | Esophagus_Muscularis            | 1084 | 1621 | 71  | 54 | 17 | 1.31 | 70 | 1  | 1.02 | 0.85 | 1.2  | 2.87E-01 |
| AD | Heart_Atrial_Appendage          | 629  | 2038 | 39  | 31 | 8  | 1.24 | 44 | 0  | 0.9  | 0.71 | 1.06 | 4.28E-01 |
| AD | Heart_Left_Ventricle            | 710  | 1846 | 51  | 36 | 16 | 1.44 | 41 | 10 | 1.24 | 0.99 | 1.51 | 5.76E-03 |
| AD | Liver                           | 245  | 2416 | 17  | 12 | 5  | 1.39 | 14 | 3  | 1.25 | 0.8  | 1.72 | 2.38E-02 |
| AD | Lung                            | 1151 | 1793 | 60  | 58 | 2  | 1.04 | 81 | 0  | 0.74 | 0.64 | 0.86 | 1.00E+00 |
| AD | Muscle_Skeletal                 | 1101 | 1356 | 62  | 55 | 7  | 1.13 | 56 | 6  | 1.11 | 0.92 | 1.32 | 3.17E-01 |
| AD | Nerve_Tibial                    | 1602 | 1550 | 107 | 80 | 27 | 1.34 | 91 | 16 | 1.18 | 1.01 | 1.36 | 2.27E-01 |
| AD | Ovary                           | 230  | 2754 | 15  | 12 | 4  | 1.3  | 16 | 0  | 0.96 | 0.61 | 1.33 | 4.88E-01 |
| AD | Pancreas                        | 698  | 2020 | 51  | 35 | 16 | 1.46 | 42 | 9  | 1.22 | 0.95 | 1.48 | 7.20E-04 |
| AD | Pituitary                       | 310  | 2947 | 17  | 16 | 2  | 1.1  | 21 | 0  | 0.8  | 0.61 | 1.07 | 1.00E+00 |
| AD | Prostate                        | 213  | 2957 | 10  | 11 | -1 | 0.94 | 12 | 0  | 0.8  | 0.36 | 1.13 | 3.69E-01 |
| AD | Skin_Not_Sun_Exposed_Suprapubic | 833  | 2022 | 42  | 42 | 0  | 1.01 | 50 | 0  | 0.84 | 0.71 | 1.01 | 1.00E+00 |
| AD | Skin_Sun_Exposed_Lower_leg      | 1327 | 1609 | 93  | 66 | 27 | 1.4  | 84 | 9  | 1.11 | 0.95 | 1.28 | 1.98E-01 |
| AD | Small_Intestine_Terminal_Ileum  | 177  | 3071 | 10  | 9  | 1  | 1.13 | 10 | 0  | 1.03 | 0.52 | 1.47 | 6.07E-02 |
| AD | Spleen                          | 410  | 2632 | 32  | 21 | 12 | 1.56 | 26 | 6  | 1.22 | 0.86 | 1.55 | 1.08E-01 |
| AD | Stomach                         | 551  | 2257 | 31  | 28 | 3  | 1.13 | 30 | 1  | 1.04 | 0.8  | 1.36 | 9.73E-01 |
| AD | Testis                          | 1340 | 2676 | 84  | 67 | 17 | 1.25 | 74 | 10 | 1.13 | 0.96 | 1.33 | 2.36E-01 |
| AD | Thyroid                         | 1523 | 1549 | 97  | 76 | 21 | 1.27 | 88 | 9  | 1.11 | 0.96 | 1.31 | 7.86E-01 |
| AD | Uterus                          | 125  | 2901 | 7   | 6  | 1  | 1.12 | 8  | 0  | 0.93 | 0.37 | 1.3  | 1.72E-01 |
| AD | Vagina                          | 120  | 2999 | 9   | 6  | 3  | 1.5  | 8  | 1  | 1.14 | 0.63 | 1.87 | 6.08E-01 |
| AD | Whole_Blood                     | 1066 | 1314 | 74  | 53 | 21 | 1.39 | 62 | 12 | 1.2  | 1    | 1.44 | 4.66E-01 |

**Table S3. (A) Top 10 ranked genes in 14 brain tissues of AD based on Sherlock analysis**

| Rank | Brain_Amygdala | Brain_Anterior_cingulate_cortex_BA24 | Brain_Caudate_basal_ganglia | Brain_Cerebellar_Hemispheres | Brain_Cerebellum | Brain_Cortex | Brain_Frontal_Cortex_BA9 | Brain_Hippocampus | Brain_Hypothalamus | Brain_Nucleus_accumbens_basal_ganglia | Brain_Putamen_basal_ganglia | Brain_Spinal_cord_cervical_c1 | Brain_Substantia_nigra | Pituitary |
|------|----------------|--------------------------------------|-----------------------------|------------------------------|------------------|--------------|--------------------------|-------------------|--------------------|---------------------------------------|-----------------------------|-------------------------------|------------------------|-----------|
| 1    | NKAIN1         | TDRD6                                | PDLIM5                      | FABP3                        | BPTF             | CHIT1        | TBC1D2                   | HLA-C             | SIGLEC14           | MCM6                                  | RPS3                        | SIGLEC14                      | SIGLEC14               | FABP3     |
| 2    | SIGLEC14       | SLC1A2                               | SIGLEC14                    | TBC1D2                       | FABP3            | SIGLEC14     | SIGLEC14                 | SIGLEC14          | HLA-C              | TBC1D2                                | KLC3                        | RASGRP3                       | TDRD6                  | SIGLEC14  |
| 3    | TDRD6          | POLE                                 | KIAA0040                    | MOB3B                        | CNTN6            | TBC1D2       | CHIT1                    | OPA3              | TDRD6              | TDRD6                                 | HLA-C                       | SNX16                         | SLC25A27               | RASGRP3   |
| 4    | SLC25A27       | TEX29                                | MPST                        | BPTF                         | SIGLEC14         | ADAMTS13     | SLC12A8                  | TDRD6             | SLC25A27           | POLE                                  | TEX29                       | CYP21A2                       | LDHC                   | NEB       |
| 5    | MGMT           | HLA-C                                | KLC3                        | HLA-C                        | MCM6             | HLA-C        | TDRD6                    | SLC25A27          | CYP21A2            | SLC25A27                              | IKBKE                       | SLC25A27                      | LINC02145              | SH3D21    |
| 6    | TIPIN          | DNMT3B                               | ACAT1                       | SIGLEC14                     | PTX3             | SH3D21       | HLA-C                    | GGH               | INVS               | CTNS                                  | TDRD6                       | OAF                           | TIPIN                  | MAP3K3    |
| 7    | CTNS           | SLC25A27                             | HLA-C                       | MICA                         | MOB3B            | ACAT1        | POLE                     | CCDC167           | LCLAT1             | LDHC                                  | MTHFSD                      | MGMT                          | GABRA4                 | IKBKE     |
| 8    | LDHC           | IFNAR1                               | IKBKE                       | DAGLB                        | PEX2             | IKBKE        | SH3D21                   | TIPIN             | CTNS               | C3orf20                               | SLC25A27                    | TIPIN                         | FAT1                   | TDRD6     |
| 9    | LAT2           | GGH                                  | POLE                        | TDRD6                        | TBC1D2           | TDRD6        | RAB37                    | MGMT              | TIPIN              | TIPIN                                 | SPARCL1                     | HLA-DRB5                      | PRKXP1                 | SLC25A27  |
| 10   | B3GAT3         | TIPIN                                | SH3D21                      | POLE                         | ATG7             | POLE         | SLC25A27                 | DPP10             | LEPROT             | ANXA6                                 | FTCD                        | BTN2A1                        | MGMT                   | CCDC38    |

**Table S3. (B) Top 10 ranked genes in 14 brain tissues of ND based on Sherlock analysis**

| Rank | Brain_Amygdala | Brain_Anterior_cingulate_cortex_BA24 | Brain_Caudate_basal_ganglia | Brain_Cerebellar_Hemisphere | Brain_Cerebellum | Brain_Cortex | Brain_Frontal_Cortex_BA9 | Brain_Hippocampus | Brain_Hypothalamus | Brain_Nucleus_accumbens_basal_ganglia | Brain_Putamen_basal_ganglia | Brain_Spinal_cord_cervical_c1 | Brain_Substantia_nigra | Pituitary |
|------|----------------|--------------------------------------|-----------------------------|-----------------------------|------------------|--------------|--------------------------|-------------------|--------------------|---------------------------------------|-----------------------------|-------------------------------|------------------------|-----------|
| 1    | CHRNA5         | CHRNA5                               | ADAMTS7                     | CHRNA5                      | IGDCC4           | NAQ          | FAM86JP                  | CYP2A7            | CHRNA5             | CYP2A7                                | CDH23                       | ANXA13                        | SYN3                   | LRP1      |
| 2    | PRKXP1         | ADAMTS7                              | CDH23                       | IGDCC4                      | CHRNA5           | ADAM17       | PRKXP1                   | CHRNA5            | CYP2A7             | PSMA4                                 | PSMA4                       | PRKXP1                        | PRKXP1                 | PRKXP1    |
| 3    | WDR18          | FAM86JP                              | PRKXP1                      | GRK4                        | ADAM17           | FAM86JP      | TFAM                     | F11               | ADAM17             | TFAM                                  | PRKXP1                      | CYP2D6                        | TSNARE1                | TFAM      |
| 4    | FRMD4B         | TPMT                                 | ADAM17                      | PRKXP1                      | GRK4             | PRKXP1       | AK5                      | PRKXP1            | PRKXP1             | PRKXP1                                | F11                         | ATIC                          | LAYN                   | GRK4      |
| 5    | FAM86JP        | PDZD7                                | LINC00839                   | CYP2D6                      | PRKXP1           | GRK4         | PFAS                     | CYP2D6            | WDR18              | PHACTR1                               | LAYN                        | WDR18                         | PDE2A                  | RAD52     |
| 6    | ATIC           | PRKXP1                               | CYP2D6                      | FAM86JP                     | PTK2B            | HEY2         | CYP2D6                   | WDR18             | NCOR2              | CYP2D6                                | ANKRD18CP                   | PIGG                          | WDR18                  | CYP2D6    |
| 7    | MC1R           | GNAQ                                 | GSAP                        | CNOT6L                      | LAYN             | PHACTR1      | RIPK1                    | LINC00839         | TSNARE1            | GRK4                                  | WDR18                       | PDE2A                         | GTF2H2                 | GPR12     |
| 8    | LAT2           | CYP2D6                               | FCGBP                       | GPR12                       | CYP2D6           | BTBD9        | WDR18                    | TRPM2             | SPTBN5             | WDR18                                 | ATG14                       | PMS2                          | HAPLN3                 | WDR18     |
| 9    | CYP2D6         | WDR18                                | WDR18                       | DNAJA4                      | FCGBP            | F11          | TPM1                     | ATG14             | GTF2H2             | FFAR4                                 | RBP4                        | HPCAL1                        | GNAL                   | ATG16L1   |
| 10   | PDZD8          | NDRG4                                | COX11                       | TFAM                        | CHRNA2           | TFAM         | ATIC                     | HAPLN3            | EPHX2              | ATG14                                 | FAM86JP                     | S100A10                       | STK31                  | TXN       |

**Table S4. (A) Top 10 ranked genes in 14 brain tissues of AD based on MetaXcan analysis**

| Rank | Brain_Amygdala | Brain_Anterior_cingulate_cortex_BA24 | Brain_Caudate_basal_ganglia | Brain_Cerebellar_Hemisphere | Brain_Cerebellum | Brain_Cortex  | Brain_Frontal_Cortex_BA9 | Brain_Hippocampus | Brain_Hypothalamus | Brain_Nucleus_accumbens_basal_ganglia | Brain_Putamen_basal_ganglia | Brain_Spinal_cord_cervical_c1 | Brain_Substantia_nigra | Pituitary     |
|------|----------------|--------------------------------------|-----------------------------|-----------------------------|------------------|---------------|--------------------------|-------------------|--------------------|---------------------------------------|-----------------------------|-------------------------------|------------------------|---------------|
| 1    | ZFP69          | RPL13AP5                             | RABGAP1L                    | C7orf63                     | ZFYVE1           | HCG22         | RANBP17                  | VN1R85P           | UBXN4              | FBXO21                                | FAM13C                      | FABP6                         | COX5A                  | AC011816.1    |
| 2    | RP11-268J15.5  | CTC-457E21.3                         | RP11-889L3.1                | TTC28                       | RPS6             | FGFR3         | RP11-420K14.3            | TC2N              | HSPD1P6            | HCG22                                 | GGT1                        | PRDM16                        | TAC1                   | CTC-457E21.3  |
| 3    | HCG22          | CALR                                 | KLF6                        | GNG2                        | TNFSF18          | AC068490.2    | SEZ6L2                   | TPMT              | RBM48              | SKI                                   | ACTG1P3                     | ACAD8                         | EFCAB11                | DPCD          |
| 4    | PIGN           | CHIT1                                | RPL34P34                    | AARS2                       | ANKK1            | CD47          | HCG22                    | SGCB              | EFCAB11            | CHCHD6                                | RP11-163O19.3               | RP11-38M8.1                   | TNFSF4                 | PDZD7         |
| 5    | RP4-789D17.5   | SLC16A3                              | RP11-57B24.1                | BMS1                        | ANKRA2           | RFWD2         | RP11-79E3.2              | ROPN1B            | RIMS4              | C11orf54                              | NFAM1                       | TLR6                          | MTRNR2L12              | ZNF300P1      |
| 6    | NKPD1          | RP11-268J15.5                        | PGLS                        | ZNF300P1                    | EFCA B11         | CTD-3092A11.1 | ZNF300P1                 | LINC00115         | HDAC2              | SNHG15                                | RP11-535M15.1               | AC079776.2                    | RP11-77P16.4           | RP11-268J15.5 |
| 7    | MXD1           | TCEA3                                | RP11-420K14.3               | KCNAB1                      | ACAA2            | GPR161        | TARS2                    | CRABP1            | GPR141             | RP11-115H18.1                         | P2RX6                       | ZFP69                         | NOB1                   | MYO5C         |
| 8    | HMMR           | B3GALT6                              | ZNF626                      | MOB3B                       | VPS52            | TOMM70A       | AC002055.4               | RP11-268J15.5     | KRT8P26            | C17orf97                              | LATS1                       | PMS2                          | HCG22                  | GTF2H4        |
| 9    | EIF4E3         | TRIM73                               | RP11-268J15.5               | AC093627.10                 | RP5-1021120.2    | AL592284.1    | SH3GLB1                  | B3GALT4           | HSPBP1             | AC007000.12                           | SAMD9L                      | ZNF649                        | LCP2                   | FABP3         |
| 10   | ACSS2          | RPS4XP14                             | GLB1L                       | CHTF18                      | WDR31            | CARD11        | RP11-1212A22.1           | FAM86DP           | OXER1              | ZNF483                                | NEIL2                       | ATG14                         | RP11-353N4.5           | ODF3B         |



**Table S4. (B) Top 10 ranked genes in 14 brain tissues of ND based on MetaXcan analysis**

| Rank | Brain_Amygdala | Brain_Anterior_cingulate_cortex_BA24 | Brain_Caudate_basal_ganglia | Brain_Cerebellar_Hemisphere | Brain_Cerebellum | Brain_Cortex  | Brain_Frontal_Cortex_BA9 | Brain_Hippocampus | Brain_Hypothalamus | Brain_Nucleus_accumbens_basal_ganglia | Brain_Putamen_basal_ganglia | Brain_Spinal_cord_cervical_c1 | Brain_Substantia_nigra | Pituitary     |
|------|----------------|--------------------------------------|-----------------------------|-----------------------------|------------------|---------------|--------------------------|-------------------|--------------------|---------------------------------------|-----------------------------|-------------------------------|------------------------|---------------|
| 1    | CTD-2541M15.4  | ZMIZ2                                | ADAMTS7                     | HSD17B8                     | PTCD3            | ATF7IP2       | SPTBN5                   | YWHAZP5           | CRABP1             | CALM2P2                               | PSMA4                       | CHRNA3                        | PSMA4                  | CHRNA5        |
| 2    | STAG3L1        | ADAMTS7                              | RSBN1L-AS1                  | CTD-2162K18.3               | ZNF181           | RP11-420K14.3 | JMJD7                    | PRKXP1            | CYP2A7             | HSPB2                                 | RP11-526I2.5                | CTSH                          | CHRNA5                 | CYP2B7P1      |
| 3    | TMX3           | RSBN1L-AS1                           | ADAM17                      | SENP6                       | CHRNA5           | PRKXP1        | GTF2IP1                  | RP11-480I12.5     | RP11-526I2.5       | PSMA4                                 | ZNF181                      | CHRNA5                        | CYP2A7                 | RP11-299H22.6 |
| 4    | USP36          | GNAQ                                 | OSBPL11                     | PDIA2                       | FEZ2             | RNF180        | PRKXP1                   | KIAA1429          | PRKXP1             | CTSV                                  | PRKXP1                      | RP11-420K14.3                 | RP11-661A12.14         | HCG17         |
| 5    | RFT1           | FEZ2                                 | RP11-526I2.5                | RSBN1L-AS1                  | RP11-420K14.3    | ADAM17        | RPAP1                    | RP11-526I2.5      | NR1D1              | HMG20A                                | CHRNA5                      | DUSP14                        | RP11-17L5.4            | PRKXP1        |
| 6    | WDR18          | HDDC2                                | RP13-977J11.2               | CHRNA5                      | RSBN1L-AS1       | AC110754.3    | RP11-420K14.3            | RP11-420K14.3     | RSBN1L-AS1         | CRLF1                                 | PSMC5                       | RSBN1L-AS1                    | RP11-526I2.5           | NSUN6         |
| 7    | RP11-497H16.9  | ZNF181                               | PRKXP1                      | RP11-420K14.3               | RP11-526I2.5     | RP11-111K18.2 | AMFR                     | LINC00839         | ASS1P2             | RP11-497H16.2                         | SHARPIN                     | PSMB9                         | ZBTB8A                 | AACSP1        |
| 8    | C5orf56        | CHRNA5                               | DZIP1L                      | FEZ2                        | PRKXP1           | OVOL1         | CHRNA5                   | FTSJ3             | LINC00115          | CNOT6L                                | RP11-561C5.5                | ASAP2                         | STAG3L1                | MRPL43        |
| 9    | PCDHGB2        | BBS2                                 | CHRNA5                      | AACSP1                      | ADAM17           | ZNF181        | RP11-665C16.6            | GENE              | RP11-480I12.7      | CHRNA5                                | GTF2H2                      | PIWIL2                        | CCDC88A                | ZMIZ2         |
| 10   | WIPF1          | RP11-420K14.3                        | SPTBN5                      | RPL5P1                      | RP11-490M8.1     | GTF2F2P2      | STRA13                   | ZNF517            | MRPL43             | AC078941.1                            | PLA2G4B                     | DDX42                         | NBPF3                  | RP11-420K14.3 |
